# Supplementary material
Source: Springer Nature journal article supplement (https://www.springermedizin.de/resource/supplementary/12916_2010_306_MOESM5_ESM.pdf/9599598)

| Study or Subgroup                                                      | Experimental |       |       | Control |       |       | Std. Mean Difference<br>IV, Random, 95% CI | Std. Mean Difference<br>IV, Random, 95% CI                                          |
|------------------------------------------------------------------------|--------------|-------|-------|---------|-------|-------|--------------------------------------------|-------------------------------------------------------------------------------------|
|                                                                        | Mean         | SD    | Total | Mean    | SD    | Total |                                            |                                                                                     |
| <b>1.1.7 Premenopausal women, proximal tibia, CSMI, cm<sup>4</sup></b> |              |       |       |         |       |       |                                            |                                                                                     |
| Vainionpää et al. 2007                                                 | 0.995        | 0.221 | 39    | 0.994   | 0.223 | 41    | 0.00 [-0.43, 0.44]                         |  |
| <b>1.1.8 Premenopausal women, mid femur, CSMI, cm<sup>4</sup></b>      |              |       |       |         |       |       |                                            |                                                                                     |
| Vainionpää et al. 2007                                                 | 1            | 0.251 | 39    | 0.999   | 0.234 | 41    | 0.00 [-0.43, 0.44]                         |  |



Supplement: MOESM5 [file 9599598]
